# Supplementary material for: Presence and Significance of Multiple Respiratory Viral Infections in Children Admitted to a Tertiary Pediatric Hospital in Italy
Source: MDPI journal article supplement (doi:10.3390/v16050750), 2024-05-09
Supplement: s1 [file s1]

**Supplementary Table S1.** Matrix table showing viral pairings observed in the samples analysed

| Co-detected virus | AdV | HBoV | 229E | NL63 | OC43 | HEV | Flu A | Flu B | MPV | PIV1 | PIV2 | PIV3 | PIV4 | HRV | RSV A | RSV B | SARS-CoV-2 | Total |
|-------------------|-----|------|------|------|------|-----|-------|-------|-----|------|------|------|------|-----|-------|-------|------------|-------|
| AdV               |     | 85   | 2    | 13   | 22   | 74  | 14    | 2     | 32  | 7    | 5    | 26   | 3    | 205 | 4     | 30    | 29         | 428   |
| HBoV              | 85  |      | 6    | 5    | 25   | 56  | 14    | 4     | 48  | 12   | 6    | 23   | 4    | 181 | 8     | 36    | 37         | 314   |
| 229E              | 2   | 6    |      | 1    | 2    | 0   | 1     | 0     | 5   | 0    | 0    | 3    | 0    | 11  | 2     | 2     | 2          | 36    |
| NL63              | 13  | 5    | 1    |      | 2    | 4   | 0     | 0     | 5   | 0    | 0    | 3    | 0    | 21  | 0     | 3     | 0          | 45    |
| OC43              | 22  | 25   | 2    | 2    |      | 13  | 14    | 1     | 16  | 1    | 0    | 7    | 1    | 42  | 10    | 24    | 4          | 132   |
| HEV               | 74  | 56   | 0    | 4    | 13   |     | 9     | 4     | 38  | 11   | 10   | 26   | 3    | 179 | 4     | 20    | 21         | 278   |
| Flu A             | 14  | 14   | 1    | 0    | 14   | 9   |       | 1     | 8   | 4    | 1    | 5    | 0    | 31  | 4     | 16    | 5          | 174   |
| Flu B             | 2   | 4    | 0    | 0    | 1    | 4   | 1     |       | 3   | 2    | 0    | 0    | 0    | 12  | 0     | 2     | 0          | 36    |
| MPV               | 32  | 48   | 5    | 5    | 16   | 38  | 8     | 3     |     | 6    | 1    | 10   | 1    | 89  | 1     | 19    | 16         | 234   |
| PIV1              | 7   | 12   | 0    | 0    | 1    | 11  | 4     | 2     | 6   |      | 3    | 3    | 0    | 33  | 1     | 8     | 1          | 54    |
| PIV2              | 5   | 6    | 0    | 0    | 0    | 10  | 1     | 0     | 1   | 3    |      | 1    | 0    | 29  | 0     | 2     | 7          | 64    |
| PIV3              | 26  | 23   | 3    | 3    | 7    | 26  | 5     | 0     | 10  | 3    | 1    |      | 0    | 75  | 2     | 10    | 13         | 193   |
| PIV4              | 3   | 4    | 0    | 0    | 1    | 3   | 0     | 0     | 1   | 0    | 0    | 0    |      | 19  | 0     | 2     | 1          | 40    |
| HRV               | 205 | 181  | 11   | 21   | 42   | 179 | 31    | 12    | 89  | 33   | 29   | 75   | 19   |     | 18    | 96    | 85         | 1256  |
| RSV A             | 4   | 8    | 2    | 0    | 10   | 4   | 4     | 0     | 1   | 1    | 0    | 2    | 0    | 18  |       | 8     | 7          | 79    |
| RSV B             | 30  | 36   | 2    | 3    | 24   | 20  | 16    | 2     | 19  | 8    | 2    | 10   | 2    | 96  | 8     |       | 13         | 308   |
| SARS-CoV-2        | 29  | 37   | 2    | 0    | 4    | 21  | 5     | 0     | 16  | 1    | 7    | 13   | 1    | 85  | 7     | 13    |            | 414   |

The total number (N) represents the sum of mono- and co-detection for each virus. In the white boxes for each viral pairings are reported the total of co-detection observed as 2,3 or >3 associations.

ADV: Adenovirus, HBoV: Human bocavirus, HCoV-229E: Human coronavirus 229E, HCoV-OC43: Human coronavirus OC43, HeV: Human enterovirus, FluA: Influenza A virus, FluB: Influenza B virus; MPV: Human metapneumovirus, PIV1: Human parainfluenza virus 1, PIV2: Human parainfluenza virus 2, PIV3: Human parainfluenza virus 3, PIV4: Human parainfluenza virus 4, HRV: Human rhinovirus, RSVA: Respiratory syncytial virus A, RSVB: Respiratory syncytial virus B, SARS-CoV-2: Severe acute respiratory syndrome coronavirus.
